# Supplementary material
Source: Springer Nature journal article supplement (https://www.springermedizin.de/resource/supplementary/12885_2008_1446_MOESM1_ESM.pdf/9472034)
Supplement: MOESM1 [file 9472034]

| Screening and Treatment<br>(cetuximab + irinotecan/FA/5-FU) | Follow-up |
|-------------------------------------------------------------|-----------|
|-------------------------------------------------------------|-----------|

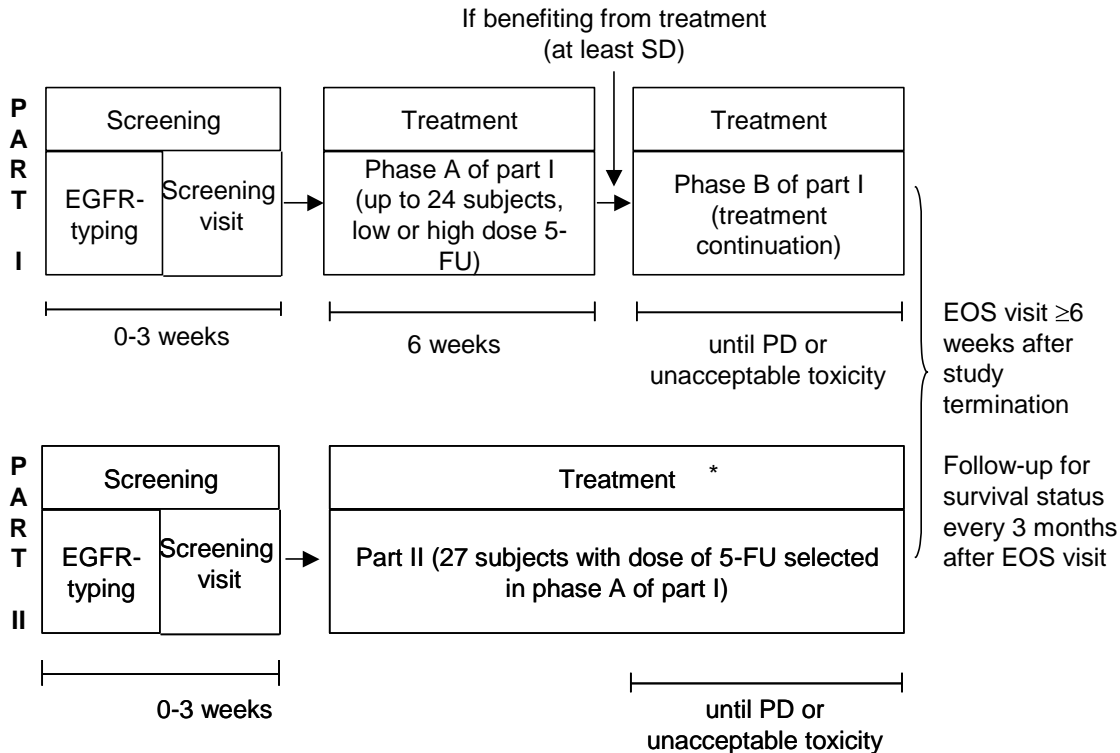

SD, stable disease; PD, disease progression; EOS, end of study visit

\* Patients benefiting from combination therapy, but with unacceptable secondary intolerance to irinotecan and/or 5-FU/FA, could receive single-agent cetuximab until unacceptable toxicity or PD.
